# Supplementary material for: Adapting Clinical Practice Guidelines for Chronic Kidney Disease: Blood Pressure Management and Kidney Replacement Therapy in Adults and Children in the Saudi Arabian context using the GRADE-ADOLOPMENT methodology
Source: Preprints.org preprint supplement (doi:10.20944/preprints202304.0080.v1), 2023-04-06
Supplement: Supplementary file 2 [file supplementary]

## The RIGHT-Ad@pt checklist

| 7 sections, 27 topics, and 34 items                          |                                                                                                                                                                                                                | Assessment                                                                                                 | Page(s)*                                 | Note(s)          |
|--------------------------------------------------------------|----------------------------------------------------------------------------------------------------------------------------------------------------------------------------------------------------------------|------------------------------------------------------------------------------------------------------------|------------------------------------------|------------------|
| <b>Basic information</b>                                     |                                                                                                                                                                                                                |                                                                                                            |                                          |                  |
| <b>Title/subtitle</b>                                        |                                                                                                                                                                                                                |                                                                                                            |                                          |                  |
| 1                                                            | Identify the report as an adaptation of practice guideline(s), that is include "guideline adaptation", "adapting", "adapted guideline/recommendation(s)", or similar terminology in the title/subtitle.        | <input checked="" type="checkbox"/> Yes<br><input type="checkbox"/> No<br><input type="checkbox"/> Unclear | 1(Pages in the full guideline document). | GRADE-ADOLOPMENT |
| 2                                                            | Describe the topic/focus/scope of the adapted guideline.                                                                                                                                                       | <input checked="" type="checkbox"/> Yes<br><input type="checkbox"/> No<br><input type="checkbox"/> Unclear | 1,2,4,5                                  |                  |
| <b>Cover/first page</b>                                      |                                                                                                                                                                                                                |                                                                                                            |                                          |                  |
| 3                                                            | Report the respective dates of publication and the literature search of the adapted guideline.                                                                                                                 | <input checked="" type="checkbox"/> Yes<br><input type="checkbox"/> No<br><input type="checkbox"/> Unclear | 1,2                                      |                  |
| 4                                                            | Describe the developer and country/region of the adapted guideline.                                                                                                                                            | <input checked="" type="checkbox"/> Yes<br><input type="checkbox"/> No<br><input type="checkbox"/> Unclear | 1,2,4-6                                  |                  |
| <b>Executive summary/abstract</b>                            |                                                                                                                                                                                                                |                                                                                                            |                                          |                  |
| 5                                                            | Provide a summary of the recommendations contained in the adapted guideline.                                                                                                                                   | <input checked="" type="checkbox"/> Yes<br><input type="checkbox"/> No<br><input type="checkbox"/> Unclear | 7-10                                     |                  |
| <b>Abbreviations and acronyms</b>                            |                                                                                                                                                                                                                |                                                                                                            |                                          |                  |
| 6                                                            | Define key terms and provide a list of abbreviations and acronyms (if applicable).                                                                                                                             | <input checked="" type="checkbox"/> Yes<br><input type="checkbox"/> No<br><input type="checkbox"/> Unclear | 99-109                                   |                  |
| <b>Contact information of the guideline adaptation group</b> |                                                                                                                                                                                                                |                                                                                                            |                                          |                  |
| 7                                                            | Report the contact information of the developer of the adapted guideline.                                                                                                                                      | <input checked="" type="checkbox"/> Yes<br><input type="checkbox"/> No<br><input type="checkbox"/> Unclear |                                          |                  |
| <b>Scope</b>                                                 |                                                                                                                                                                                                                |                                                                                                            |                                          |                  |
| <b>Source guideline(s)</b>                                   |                                                                                                                                                                                                                |                                                                                                            |                                          |                  |
| 8                                                            | Report the name and year of publication of the source guideline(s), provide the citation(s), and whether source authors were contacted.                                                                        | <input checked="" type="checkbox"/> Yes<br><input type="checkbox"/> No<br><input type="checkbox"/> Unclear | 155, 90, 338                             |                  |
| <b>Brief description of the health problem(s)</b>            |                                                                                                                                                                                                                |                                                                                                            |                                          |                  |
| 9                                                            | Provide the basic epidemiological information about the problem (including the associated burden), health systems relevant issues, and note any relevant differences compared to the source guideline(s).      | <input checked="" type="checkbox"/> Yes<br><input type="checkbox"/> No<br><input type="checkbox"/> Unclear | 15                                       |                  |
| <b>Aim(s) and specific objectives</b>                        |                                                                                                                                                                                                                |                                                                                                            |                                          |                  |
| 10                                                           | Describe the aim(s) of the adapted guideline and specific objectives, and note any relevant differences compared to the source guideline(s).                                                                   | <input checked="" type="checkbox"/> Yes<br><input type="checkbox"/> No<br><input type="checkbox"/> Unclear | 4, 5                                     |                  |
| <b>Target population(s)</b>                                  |                                                                                                                                                                                                                |                                                                                                            |                                          |                  |
| 11                                                           | Describe the target population(s) and subgroup(s) (if applicable) to which the recommendation(s) is addressed in the adapted guideline, and note any relevant differences compared to the source guideline(s). | <input checked="" type="checkbox"/> Yes<br><input type="checkbox"/> No<br><input type="checkbox"/> Unclear | 2, 4                                     |                  |
| <b>End-users and settings</b>                                |                                                                                                                                                                                                                |                                                                                                            |                                          |                  |
| 12                                                           | Describe the intended target users of the adapted guideline, and note any relevant differences compared to the source guideline(s).                                                                            | <input checked="" type="checkbox"/> Yes<br><input type="checkbox"/> No<br><input type="checkbox"/> Unclear | 1, 5                                     |                  |
| 13                                                           | Describe the setting(s) for which the adapted guideline is intended, and note any relevant differences compared to the source guideline(s).                                                                    | <input checked="" type="checkbox"/> Yes<br><input type="checkbox"/> No<br><input type="checkbox"/> Unclear | 22                                       |                  |
| <b>Rigor of development</b>                                  |                                                                                                                                                                                                                |                                                                                                            |                                          |                  |

|                                                                                           |                                                                                                                                                                                                                                    |                                                                                                            |
|-------------------------------------------------------------------------------------------|------------------------------------------------------------------------------------------------------------------------------------------------------------------------------------------------------------------------------------|------------------------------------------------------------------------------------------------------------|
| <b>Guideline adaptation group</b>                                                         |                                                                                                                                                                                                                                    |                                                                                                            |
| 14                                                                                        | List all contributors to the guideline adaptation process and describe their selection process and responsibilities.                                                                                                               | <input checked="" type="checkbox"/> Yes<br><input type="checkbox"/> No<br><input type="checkbox"/> Unclear |
|                                                                                           |                                                                                                                                                                                                                                    | 1, 61                                                                                                      |
| <b>Adaptation framework/methodology</b>                                                   |                                                                                                                                                                                                                                    |                                                                                                            |
| 15                                                                                        | Report which framework or methodology was used in the guideline adaptation process.                                                                                                                                                | <input checked="" type="checkbox"/> Yes<br><input type="checkbox"/> No<br><input type="checkbox"/> Unclear |
|                                                                                           |                                                                                                                                                                                                                                    | 3, 6, 114,                                                                                                 |
| <b>Source guideline(s)</b>                                                                |                                                                                                                                                                                                                                    |                                                                                                            |
| 16                                                                                        | Describe how the specific source guideline(s) was(were) selected.                                                                                                                                                                  | <input checked="" type="checkbox"/> Yes<br><input type="checkbox"/> No<br><input type="checkbox"/> Unclear |
|                                                                                           |                                                                                                                                                                                                                                    | 69, 120,<br>124, 127,<br>129, 131,<br>133, 135,<br>136, 137                                                |
| <b>Key questions</b>                                                                      |                                                                                                                                                                                                                                    |                                                                                                            |
| 17                                                                                        | State the key questions of the adapted guideline using a structured format, such as PICO (population, intervention, comparator, and outcome), or another format as appropriate.                                                    | <input checked="" type="checkbox"/> Yes<br><input type="checkbox"/> No<br><input type="checkbox"/> Unclear |
|                                                                                           |                                                                                                                                                                                                                                    | 4, 7, 63,<br>64, 69                                                                                        |
| 18                                                                                        | Describe how the key questions were developed/modified, and/or prioritized.                                                                                                                                                        | <input checked="" type="checkbox"/> Yes<br><input type="checkbox"/> No<br><input type="checkbox"/> Unclear |
|                                                                                           |                                                                                                                                                                                                                                    | 4, 65,                                                                                                     |
| <b>Source recommendation(s)</b>                                                           |                                                                                                                                                                                                                                    |                                                                                                            |
| 19                                                                                        | Describe how the recommendation(s) from the source guideline(s) was(were) assessed with respect to the evidence considered for the different criteria, the judgements and considerations made by the original panel.               | <input checked="" type="checkbox"/> Yes<br><input type="checkbox"/> No<br><input type="checkbox"/> Unclear |
|                                                                                           |                                                                                                                                                                                                                                    | 69-72                                                                                                      |
| <b>Evidence synthesis</b>                                                                 |                                                                                                                                                                                                                                    |                                                                                                            |
| 20                                                                                        | Indicate whether the adapted recommendation(s) is/are based on existing evidence from the source guideline(s), and/or additional evidence.                                                                                         | <input checked="" type="checkbox"/> Yes<br><input type="checkbox"/> No<br><input type="checkbox"/> Unclear |
|                                                                                           |                                                                                                                                                                                                                                    | 69-72,<br>202-336                                                                                          |
| 21                                                                                        | If new research evidence was used, describe how it was identified and assessed.                                                                                                                                                    | <input checked="" type="checkbox"/> Yes<br><input type="checkbox"/> No<br><input type="checkbox"/> Unclear |
|                                                                                           |                                                                                                                                                                                                                                    | 69-72,<br>202-336                                                                                          |
| <b>Assessment of the certainty of the body of evidence and strength of recommendation</b> |                                                                                                                                                                                                                                    |                                                                                                            |
| 22                                                                                        | Describe the approach used to assess the certainty/quality of the body/ies of evidence and the strength of recommendations in the adapted guideline and note any differences (if applicable) compared to the source guideline(s).  | <input checked="" type="checkbox"/> Yes<br><input type="checkbox"/> No<br><input type="checkbox"/> Unclear |
|                                                                                           |                                                                                                                                                                                                                                    | 69-72,<br>202-336                                                                                          |
| <b>Decision-making processes</b>                                                          |                                                                                                                                                                                                                                    |                                                                                                            |
| 23                                                                                        | Describe the processes used by the guideline adaptation group to make decisions, particularly the formulation of recommendations.                                                                                                  | <input checked="" type="checkbox"/> Yes<br><input type="checkbox"/> No<br><input type="checkbox"/> Unclear |
|                                                                                           |                                                                                                                                                                                                                                    | 71                                                                                                         |
| <b>Recommendations</b>                                                                    |                                                                                                                                                                                                                                    |                                                                                                            |
| <b>Recommendations</b>                                                                    |                                                                                                                                                                                                                                    |                                                                                                            |
| 24                                                                                        | Report recommendations and indicate whether they were adapted, adopted, or <i>de novo</i> .                                                                                                                                        | <input checked="" type="checkbox"/> Yes<br><input type="checkbox"/> No<br><input type="checkbox"/> Unclear |
|                                                                                           |                                                                                                                                                                                                                                    | 7, 22                                                                                                      |
| 25                                                                                        | Indicate the direction and strength of the recommendations and the certainty/quality of the supporting evidence and note any differences compared to the source recommendations(s) (if applicable).                                | <input checked="" type="checkbox"/> Yes<br><input type="checkbox"/> No<br><input type="checkbox"/> Unclear |
|                                                                                           |                                                                                                                                                                                                                                    | 138, 202                                                                                                   |
| 26                                                                                        | Present separate recommendations for important subgroups if the evidence suggests important differences in factors influencing recommendations and note any differences compared to the source recommendations(s) (if applicable). | <input checked="" type="checkbox"/> Yes<br><input type="checkbox"/> No<br><input type="checkbox"/> Unclear |
|                                                                                           |                                                                                                                                                                                                                                    | 6, 31, 71                                                                                                  |

|                                                         |                                                                                                                                                                           |                                                                                                            |                                                                                            |
|---------------------------------------------------------|---------------------------------------------------------------------------------------------------------------------------------------------------------------------------|------------------------------------------------------------------------------------------------------------|--------------------------------------------------------------------------------------------|
| <b>Rationale/explanation for recommendations</b>        |                                                                                                                                                                           |                                                                                                            |                                                                                            |
| 27                                                      | Describe the criteria/factors that were considered to formulate the recommendations or note any relevant differences compared to the source guideline(s) (if applicable). | <input checked="" type="checkbox"/> Yes<br><input type="checkbox"/> No<br><input type="checkbox"/> Unclear | 22-60                                                                                      |
| <b>External review and quality assurance</b>            |                                                                                                                                                                           |                                                                                                            |                                                                                            |
| <b>External review</b>                                  |                                                                                                                                                                           |                                                                                                            |                                                                                            |
| 28                                                      | Indicate whether the adapted guideline underwent an independent external review. If yes, describe the process.                                                            | <input checked="" type="checkbox"/> Yes<br><input type="checkbox"/> No<br><input type="checkbox"/> Unclear | 74                                                                                         |
| <b>Organizational approval</b>                          |                                                                                                                                                                           |                                                                                                            |                                                                                            |
| 29                                                      | Indicate whether the adapted guideline obtained organizational approval. If yes, describe the process.                                                                    | <input checked="" type="checkbox"/> Yes<br><input type="checkbox"/> No<br><input type="checkbox"/> Unclear | 74                                                                                         |
| <b>Funding, declaration, and management of interest</b> |                                                                                                                                                                           |                                                                                                            |                                                                                            |
| <b>Funding source(s) and funder role(s)</b>             |                                                                                                                                                                           |                                                                                                            |                                                                                            |
| 30                                                      | Report all sources of funding for the adapted guideline and source guideline(s), and the role of the funders.                                                             | <input checked="" type="checkbox"/> Yes<br><input type="checkbox"/> No<br><input type="checkbox"/> Unclear | 63                                                                                         |
| <b>Declaration and management of interests</b>          |                                                                                                                                                                           |                                                                                                            |                                                                                            |
| 31                                                      | Report all conflicts of interest of the adapted and the source guideline(s) panels, and how they were evaluated and managed.                                              | <input checked="" type="checkbox"/> Yes<br><input type="checkbox"/> No<br><input type="checkbox"/> Unclear | 63, 72, 202                                                                                |
| <b>Other information</b>                                |                                                                                                                                                                           |                                                                                                            |                                                                                            |
| <b>Implementation</b>                                   |                                                                                                                                                                           |                                                                                                            |                                                                                            |
| 32                                                      | Describe the potential barriers and strategies for implementing the recommendations (if applicable).                                                                      | <input checked="" type="checkbox"/> Yes<br><input type="checkbox"/> No<br><input type="checkbox"/> Unclear | 39, 58, 69, 107, 108, 199, 335, 24, 27, 30, 33, 36, 39, 41, 44, 48, 51, 55, 59, 62, 76, 88 |
| <b>Update</b>                                           |                                                                                                                                                                           |                                                                                                            |                                                                                            |
| 33                                                      | Briefly describe the strategy for updating the adapted guideline (if applicable).                                                                                         | <input checked="" type="checkbox"/> Yes<br><input type="checkbox"/> No<br><input type="checkbox"/> Unclear | 89                                                                                         |
| <b>Limitations and suggestions for further research</b> |                                                                                                                                                                           |                                                                                                            |                                                                                            |
| 34                                                      | Describe the challenges of the adaptation process, the limitations of the evidence, and provide suggestions for future research.                                          | <input checked="" type="checkbox"/> Yes<br><input type="checkbox"/> No<br><input type="checkbox"/> Unclear | 24, 27, 30, 33, 36, 40, 42, 44, 48, 51, 55, 59                                             |

RIGHT=Reporting Items for practice Guidelines in Healthcare

\*Page numbers refer to the full guideline document:

**2022 Saudi Guideline for Chronic Kidney Disease: Blood Pressure Management and Kidney Replacement Therapy in Adults and Children**
