# Supplementary material for: Adapting Clinical Practice Guidelines for Chronic Kidney Disease: Blood Pressure Management and Kidney Replacement Therapy in Adults and Children in the Saudi Arabian context using the GRADE-ADOLOPMENT methodology
Source: Preprints.org preprint supplement (doi:10.20944/preprints202304.0080.v1), 2023-04-06
Supplement: Supplementary file 4 [file supplementary]

Archive with 3 entries (3 files):
- AGREE-Reporting-Checklist_CKD-CPG.pdf
- CKD Guideline_Draft Q1-12_FINAL 23NOV2022.pdf
- RIGHT-Ad@pt_Checklist_CKD-CPG.pdf
